# Supplementary material for: Oxo-bridged metal carbene complexes. Synthesis, structure and reactivities of {[Os(Por)(CPh2)]2O} (Por = porphyrinato dianion)
Source: Royal Society of Chemistry journal article supplement (doi:10.1039/b300441d), 2003-01-01
Supplement: b300441d.pdf [file b300441d.pdf]

## Electronic Supplementary Information

### Oxo-bridged metal carbene complexes. Synthesis, structure and reactivities of $\{\{\text{Os}(\text{Por})(\text{CPh}_2)_2\text{O}\}$ (Por = porphyrinato dianion)

Yan Li, Jie-Sheng Huang, Zhong-Yuan Zhou and Chi-Ming Che\*

#### Experimental Section

Dichloromethane was distilled from calcium hydride before use. Diphenyldiazomethane,<sup>1</sup> allylic diazoacetates<sup>2</sup> and all porphyrinato osmium carbonyl complexes<sup>3</sup> were prepared according to the literature methods. Various alkenes purchased from Aldrich were purified by passing through aluminum oxide. UV-visible spectra were recorded on a HP 8453 Diode Array spectrophotometer. Infra-red spectra were obtained on a BIO-RAD FTS 165 spectrometer. Mass spectra were recorded on a Finnigan MAT 95 mass spectrometer. GC-MS measurements were performed on a HP G1800C GCD Series II spectrometer with an Ultra 2 cross-linked 5% phenyl-methyl silicone column (25 m × 0.2 mm × 0.33 μm). <sup>1</sup>H NMR and <sup>13</sup>C NMR spectra were obtained using Bruker DPX-300 FT-NMR spectrometer; the chemical shifts (δ, ppm) are relative to tetramethylsilane (*J* values are given in Hz). Elemental analyses were performed by the Institute of Chemistry, the Chinese Academy of Sciences.

**General procedure for preparation of  $\{\{\text{Os}(\text{Por})(\text{CPh}_2)_2\text{O}\}$ :** To a solution of  $[\text{Os}(\text{Por})(\text{CO})]$  (0.05 mmol, 10 ml) in benzene was added a solution of  $\text{N}_2\text{CPh}_2$  (38.8 mg, 0.20 mmol) in the same solvent (10 ml) using syringe pump over 10 h at room temperature. The mixture was evaporated under reduced pressure. The desired product was purified by chromatography on alumina column using dichloromethane/hexane (1:2 v/v) as eluent.

**$\{\{\text{Os}(\text{TPP})(\text{CPh}_2)_2\text{O}\}$  (1):** Yield: 80%; <sup>1</sup>H NMR ( $\text{CDCl}_3$ ): δ 8.71 (d, 8H, 7.43), 8.12 (s, 16H,  $\text{H}_\beta$ ), 7.81 (t, 8H, 7.57), 7.72 (t, 8H, 7.68), 7.49 (t, 8H, 7.48), 7.05 (d, 8H, 7.42), 5.71 (t, 4H, 7.18), 5.45 (t, 8H, 7.69), 1.21 (d, 8H, 7.66); <sup>13</sup>C NMR ( $\text{CDCl}_3$ ): δ 268.84 (Os=C); UV/vis ( $\text{CH}_2\text{Cl}_2$ ):  $\lambda_{\text{max}}/\text{nm}$  (log ε) 408 (5.10), 529 (4.20), 607 (3.95), 735 (3.95); IR (KBr): 1016  $\text{cm}^{-1}$  (oxidation state marker band); Anal. Calcd for  $\text{C}_{114}\text{H}_{76}\text{N}_8\text{OOS}_2$ : C 70.06, H 3.92, N 5.73; Found: C 69.64, H 4.14, N 5.26; FAB MS:  $m/z$  1955  $[\text{M} + \text{H}]^+$ .

**$\{\{\text{Os}(\text{TTP})(\text{CPh}_2)_2\text{O}\}$  (2):** Yield: 74%; <sup>1</sup>H NMR ( $\text{CDCl}_3$ ): δ 8.71 (d, 8H, 7.55), 8.08 (s, 16H,  $\text{H}_\beta$ ), 7.61 (d, 8H, 7.57), 7.29 (d, 8H, 7.52), 6.95 (d, 8H, 7.52), 5.64 (t, 4H, 7.20), 5.41 (t, 8H, 7.57), 2.72 (s, 24H), 1.19 (d, 8H, 7.46); <sup>13</sup>C NMR ( $\text{CDCl}_3$ ): δ 266.20 (Os=C); UV/vis ( $\text{CH}_2\text{Cl}_2$ ):  $\lambda_{\text{max}}/\text{nm}$  (log ε) 413 (5.12), 532 (4.22), 613 (3.96), 734 (3.97); IR (KBr): 1016  $\text{cm}^{-1}$  (oxidation state marker band); Anal. Calcd for  $\text{C}_{122}\text{H}_{92}\text{N}_8\text{OOS}_2 \cdot \text{C}_6\text{H}_{14}$ : C 71.41, H 4.96, N 5.20; Found: C 71.80, H 4.68, N 4.75; FAB MS:  $m/z$  2067  $[\text{M} + \text{H}]^+$ . The crystals suitable for X-ray structure determination were obtained by slow evaporation of a solution of **2** in dichloromethane-hexane at room temperature.

**{[Os(4-F-TPP)(CPh<sub>2</sub>)<sub>2</sub>O]}** (**3**): Yield: 80%; <sup>1</sup>H NMR (CDCl<sub>3</sub>): δ 8.60–8.56 (m, 8H), 8.06 (s, 16H, H<sub>β</sub>), 7.56–7.51 (m, 8H), 7.24–7.19 (m, 8H), 7.00–6.96 (m, 8H), 5.69 (t, 4H, 7.23), 5.44 (t, 8H, 7.66), 1.15 (d, 8H, 7.64); <sup>13</sup>C NMR (CDCl<sub>3</sub>): δ 269.28 (Os=C); UV/vis (CH<sub>2</sub>Cl<sub>2</sub>): λ<sub>max</sub>/nm (log ε) 409 (5.12), 530 (4.24), 605 (sh, 3.96), 734 (3.98); IR (KBr): 1015 cm<sup>-1</sup> (oxidation state marker band); Anal. Calcd for C<sub>114</sub>H<sub>68</sub>F<sub>8</sub>N<sub>8</sub>OOS<sub>2</sub>·C<sub>6</sub>H<sub>14</sub>: C 65.98, H 3.78, N 5.13; Found: C 66.24, H 3.84, N 4.88; FAB MS: *m/z* 2100 [M + H]<sup>+</sup>.

**{[Os(4-Cl-TPP)(CPh<sub>2</sub>)<sub>2</sub>O]}** (**4**): This product was contaminated by 1,1,2,2-tetraphenylethylene (C<sub>26</sub>H<sub>20</sub>, the carbene coupling product of N<sub>2</sub>CPh<sub>2</sub>). Yield: 72%; <sup>1</sup>H NMR (CDCl<sub>3</sub>): δ 8.53 (d, 8H, 8.10), 8.06 (s, 16H, H<sub>β</sub>), 7.84 (d, 8H, 8.03), 7.50 (d, 8H, 8.10), 6.94 (d, 8H, 8.04), 5.68 (t, 4H, 7.25), 5.43 (t, 8H, 7.61), 1.13 (d, 8H, 7.58); <sup>13</sup>C NMR (CDCl<sub>3</sub>): δ 269.94 (Os=C); UV/vis (CH<sub>2</sub>Cl<sub>2</sub>): λ<sub>max</sub>/nm (log ε) 413 (5.06), 530 (4.14), 606 (sh, 3.88), 735 (3.86); IR (KBr): 1013 cm<sup>-1</sup> (oxidation state marker band); Anal. Calcd for C<sub>114</sub>H<sub>68</sub>Cl<sub>8</sub>N<sub>8</sub>OOS<sub>2</sub>·1/2C<sub>26</sub>H<sub>20</sub>: C 63.66, H 3.28, N 4.68; Found: C 63.97, H 3.54, N 5.14; FAB MS: *m/z* 2231 [M + H]<sup>+</sup>.

**{[Os(4-Br-TPP)(CPh<sub>2</sub>)<sub>2</sub>O]}** (**5**): Yield: 58%; <sup>1</sup>H NMR (CDCl<sub>3</sub>): δ 8.45 (d, 8H, 8.03), 8.05 (s, 16H, H<sub>β</sub>), 8.00 (d, 8H, 8.05), 7.65 (d, 8H, 8.04), 6.87 (d, 8H, 8.04), 5.68 (t, 4H, 7.18), 5.42 (t, 8H, 7.63), 1.12 (d, 8H, 7.12); <sup>13</sup>C NMR (CDCl<sub>3</sub>): δ 270.06 (Os=C); UV/vis (CH<sub>2</sub>Cl<sub>2</sub>): λ<sub>max</sub>/nm (log ε) 413 (5.16), 527 (4.25), 604 (sh, 3.99), 732 (3.91); IR (KBr): 1011 cm<sup>-1</sup> (oxidation state marker band); Anal. Calcd for C<sub>114</sub>H<sub>68</sub>Br<sub>8</sub>N<sub>8</sub>OOS<sub>2</sub>: C 52.96, H 2.65, N 4.33; Found: C 53.34, H 2.82, N 4.10; FAB MS: *m/z* 2587 [M + H]<sup>+</sup>.

**Preparation of [Os(TTP)(CPh<sub>2</sub>)(py)]** (**6**): A solution of **2** (50 mg, 0.024 mmol) and excess pyridine (ca. 10 mg) in benzene (20 ml) was refluxed for 20 h. Flash chromatography of the reaction mixture on an alumina column using dichloromethane/hexane (1:1 v/v) as eluent gave the desired product as a brownish red solid in 36% yield. The crystals suitable for X-ray structure determination were obtained by slow evaporation of a solution of **6** in dichloromethane-hexane at room temperature. <sup>1</sup>H NMR (CDCl<sub>3</sub>): δ 7.76 (s, 8H, H<sub>β</sub>), 7.71–7.68 (m, 8H), 7.42 (d, 4H, 6.95), 7.35 (d, 4H, 7.06), 6.49 (t, 2H, 7.36), 6.18 (t, 4H, 7.70), 3.89 (d, 4H, 7.96), the signals of bound pyridine: 6.46 (br, 1H), 5.80 (br, 2H), 2.76 (br, 2H); <sup>13</sup>C NMR (CDCl<sub>3</sub>): δ 279.16 (Os=C); UV/vis (CH<sub>2</sub>Cl<sub>2</sub>): λ<sub>max</sub>/nm 398 (Soret), 429 sh, 523, 551; IR (KBr): 1014 cm<sup>-1</sup> (oxidation state marker band); Anal. Calcd for C<sub>66</sub>H<sub>51</sub>N<sub>5</sub>Os: C 71.78, H 4.65, N 6.34; Found: C 71.32, H 4.34, N 6.52; FAB MS: *m/z* 1027 [M – Py + H]<sup>+</sup>.

**Intermolecular cyclopropanation of alkenes with ethyl diazoacetate (EDA) catalysed by 2.** To a solution of **2** (1.03 mg, 0.5 μmol) and alkene (10 mmol) in dichloromethane (2 ml) was added a solution of EDA (57.05 mg, 0.5 mmol) in dichloromethane (10 ml) using syringe pump over 5 h at room temperature. The reaction mixture was stirred for an additional 1 h and then evaporated to dryness in vacuo. The *trans:cis* ratio was determined by GC-MS. The cyclopropyl ester products were purified by chromatography on a silica gel column with diethyl ether/hexane (1:5 v/v) as eluent.

**Intramolecular cyclopropanation of allylic diazoacetates catalysed by 2.** To a solution of **2** (1.03 mg, 0.5 μmol) in dichloromethane (1 ml) was added a solution of allylic diazoacetate (1.0 mmol) in dichloromethane (10 ml) using syringe pump over

10 h at 40 °C. The reaction mixture was stirred for an additional 1 h and then evaporated to dryness in vacuo. The bicyclic lactone thus obtained was purified by chromatography on a silica gel column with diethyl ether/hexane (1:5 v/v) as eluent.

**C–H insertion reaction of cyclohexene with EDA catalysed by 2.** To a solution of **2** (1.03 mg, 0.5 μmol) in cyclohexene (1 ml) was added a solution of EDA (0.25 mmol) in cyclohexene (7 ml) using syringe pump over 10 h at 60 °C. The reaction mixture was further stirred for 1 h and then evaporated to dryness under reduced pressure. The products ethyl (cyclohexen-2-yl)acetate and 7-ethoxycarbonylbicyclo[4.1.0]heptane were purified by chromatography on a silica gel column with diethyl ether/hexane (1:5 v/v) as eluent and were identified as reported in the literature.<sup>4</sup>

### References:

1. J. B. Miller, *J. Org. Chem.* 1959, **24**, 560.
2. M. P. Doyle, R. E. Austin, A. S. Bailey, M. P. Dwyer, A. B. Dyatkin, A. V. Kalinin, M. M. Y. Kwan, S. Liras, C. J. Oalmann, R. J. Pieters, M. N. Protopopova, C. E. Raab, G. H. P. Roos, Q.-L. Zhou, S. F. Martin, *J. Am. Chem. Soc.* 1995, **117**, 5763.
3. C.-M. Che, C.-K. Poon, W.-C. Chung, H. B. Gray, *Inorg. Chem.* 1985, **24**, 1277.
4. P. Müller, S. Tohill, *Tetrahedron* 2000, **56**, 1725.

**Table S1.** Cyclopropanation of alkenes with EDA catalysed by **2**<sup>a</sup>

| Entry | Alkene<br>R <sup>1</sup> | Alkene<br>R <sup>2</sup> | Conversion<br>of EDA (%) | Yield (%) <sup>b</sup><br>( <i>trans</i> + <i>cis</i> ) | Ratio of<br><i>trans</i> : <i>cis</i> <sup>c</sup> |
|-------|--------------------------|--------------------------|--------------------------|---------------------------------------------------------|----------------------------------------------------|
| 1     | Ph                       | H                        | 100                      | 99                                                      | 9.4:1                                              |
| 2     | 4-Cl-Ph                  | H                        | 100                      | 86                                                      | 8.8:1                                              |
| 3     | Ph                       | Ph                       | 100                      | 91                                                      |                                                    |

<sup>a</sup> Reaction conditions: CH<sub>2</sub>Cl<sub>2</sub>, r.t., 5 h; **2**:EDA:alkene molar ratio = 1:1000:20000. <sup>b</sup> Based on consumed EDA. <sup>c</sup> Determined by GC-MS.

**Table S2** Intramolecular cyclopropanation of allylic diazoacetates catalysed by **2**<sup>a</sup>

| Entry | R <sup>3</sup>                                      | Substrate<br>R <sup>4</sup>   | Conversion<br>(%) | Yield <sup>b</sup><br>(%) |
|-------|-----------------------------------------------------|-------------------------------|-------------------|---------------------------|
| 1     | Ph                                                  | H                             | 90                | 63                        |
| 2     | H                                                   | C <sub>2</sub> H <sub>5</sub> | 95                | 78                        |
| 3     | Me <sub>2</sub> C=CH(CH <sub>2</sub> ) <sub>2</sub> | Me                            | 76                | 58                        |

<sup>a</sup> Reaction conditions: CH<sub>2</sub>Cl<sub>2</sub>, 40 °C, 10 h.; **2**:substrate = 1:2000 (molar ratio). <sup>b</sup> Based on consumed substrate.
